# Supplementary material for: Subcellular co-delivery of two different site-oriented payloads for tumor therapy
Source: Royal Society of Chemistry journal article supplement (doi:10.1039/c6nr08200a), 2016-12-15
Supplement: c6nr08200a1.pdf [file c6nr08200a1.pdf]

# Subcellular co-delivery of two different site-oriented payloads for tumor therapy

*Qingqing Yang<sup>1</sup>, Lei Wu<sup>1</sup>, Lian Li, Zhou Zhou and Yuan Huang\**

Key Laboratory of Drug Targeting and Drug Delivery System, Ministry of Education,  
West China School of Pharmacy, Sichuan University. No. 17, Block 3, Southern  
Renmin Road, Chengdu 610041, P.R. China

## **Corresponding Author**

\*E-mail: huangyuan0@163.com, Tel.: +86-28-85501617, Fax: +86-28-85501617.

## **Author Contributions**

<sup>1</sup> These authors contributed equally to this work.

## Materials

OctaAmmonium polyhedral oligomeric silsesquioxanes (POSS-NH<sub>2</sub>) was purchased from Hybrid Plastics (Hattiesburg, USA). N-succinimidyl 3-(2-pyridyldithio) propionate (SPDP) was obtained from TCI Chemical Industry Co., Ltd. (Shanghai, China). The following reagents were purchased from Sigma-Aldrich (St. Louis, MO): levulinic acid (LEV), fluorescein isothiocyanate (FITC), dithiothreitol (DTT), 2,4,6-trinitrobenzene-1-sulfonic acid (TNBSA), 5,5'-dithio-bis(2-nitrobenzoic acid) (DTNB). All other reagents and solvents were purchased from Aladdin Reagent Co., Ltd. (Shanghai, China) and used as received.

N-(2-Hydroxypropyl)methacrylamide (HPMA),<sup>1</sup> N-(tert-butoxycarbonyl)-N'-(6-methacrylamido-hexanoyl)-hydrazine (Ma-ah-NHNH-Boc),<sup>2</sup> 3,3'-[4,4'-azobis(4-cyano-4-methyl-1-oxo-butane-4,1-diyl)]bis(thiazolidine-2-thione) (ABIK-TT),<sup>3</sup> N-methacryloyl-aminopropyl-fluorescein-5-isothiocyanate (MA-AP-FITC)<sup>4</sup>, 2-(2-pyridyldithio)-ethylamine hydrochloride (PDEA)<sup>5</sup> and the derivative of docetaxel(DTX) with levulinic acid (DTX-LEV)<sup>6</sup> were synthesized according to previous reports.

## Synthesis of Pyridyldisulfanyl-Functionalized POSS (POSS-PDS)<sup>6</sup>

POSS-PDS was prepared by the reaction of amino groups of POSS-NH<sub>2</sub> with SPDP as follows: POSS-NH<sub>2</sub> (23 mg, 0.16 mmol amino groups) was dissolved in methanol, and a solution of SPDP (100 mg, 0.32 mmol) and N-ethyldiisopropylamine (10 μL) in

2 mL methanol was added. The reaction mixture was subsequently stirred for 2 h at room temperature. POSS-PDS was purified by gel filtration on Sephadex LH-20 column using methanol as eluent.

### **Synthesis and Characterization of the Thiol-Terminated Semitelechelic HPMA Copolymer (P-SH)<sup>6</sup>**

Semitelechelic HPMA copolymer precursor (P-SH) containing *tert*-butoxycarbonyl (Boc)-protected hydrazide groups and copolymer chain terminating with sulfhydryl groups was prepared in three consecutive steps. First, semitelechelic HPMA copolymer terminated in thiazolidine-2-thione (TT) groups (P-TT) was prepared by radical solution polymerization according to the established procedures.<sup>7</sup> Briefly, HPMA (93 mol%), Ma-ah-NHNH-Boc (7 mol%) were dissolved in dimethyl sulfoxide (DMSO) initiated with AIBN-TT (4 wt%). The solution was purged with nitrogen and stirred at 50 °C for 6 h. The copolymer was isolated by precipitation into diethyl ether. Similar procedure was followed to prepare fluorescence labeled semitelechelic polymer precursor (P-TT-FITC), using HPMA (91 mol%), Ma-ah-NHNH-Boc (7 mol%), MA-AP-FITC (2 mol%). Second, the 2-pyridyldisulfanyl (PDS)-terminated semitelechelic HPMA copolymer (P-PDS) was synthesized by the reaction of terminal TT groups of the polymer P-TT with PDEA in N,N-dimethylformamide (DMF) as previously described.<sup>7</sup> Briefly, P-TT (0.048 mmol TT) was dissolved in DMF and a solution of (0.062 mmol) and N-ethyldiisopropylamine (10  $\mu$ L) in DMF was added. After 3 h of stirring the reaction mixture was diluted with

methanol and purified by gel filtration on a Sephadex LH-20 column using methanol as eluent. Finally, the sulfhydryl group-terminated semitelechelic copolymer precursor (P-SH) was prepared by reduction of chain terminal PDS groups of P-PDS with DTT.<sup>8</sup> Example of the reaction: P-PDS was dissolved in distilled water and excess DTT was added under gentle stirring for 30 min. The resulting P-SH was purified by gel filtration on a Sephadex G-25 column using double distilled water as eluent. The polymer solution was lyophilized to obtain the product P-SH.

The content of end-chain TT groups in P-TT was determined by UV-vis spectroscopy using  $\epsilon_{305}=10\,700\text{ L mol}^{-1}\text{ cm}^{-1}$  (methanol). The content of PDS end groups in P-PDS was determined by UV-vis spectroscopy after reaction with DTT.<sup>9</sup> The content of SH groups in P-SH was determined with Ellman's reagent.<sup>10</sup> The content of hydrazide groups in star copolymers was determined by TNBSA assay. The molecular weight and polydispersity index of copolymers were measured based on a HPMA homopolymer calibration using an AKTA Fast Protein Liquid Chromatography (FPLC) system [GE Healthcare Life Sciences; Superose 6 10/300GL analytical column; mobile phase, phosphate buffer (pH 7.4)] equipped with UV and refractive index detectors.

### **Synthesis of Star Copolymer-Docetaxel Conjugates<sup>6</sup>**

POSS-based star copolymers were synthesized by the reaction of thiol groups in P-SH with PDS groups of POSS-PDS as follows: P-SH (10  $\mu\text{mol}$  SH groups) was dissolved

in dimethylsulfoxide (DMSO) and added to a stirring solution of POSS-PDS (8.13  $\mu\text{mol}$  PDS groups) in DMSO under argon atmosphere. After 4 h of agitation, the mixture was diluted with methanol and the products were purified by gel filtration (Sephadex LH-20, methanol).

Star copolymer-DTX conjugates were synthesized after separating the Boc groups from hydrazides of star copolymers using trifluoroacetic acid.<sup>11</sup> Then star copolymers were dissolved in anhydrous methanol and DTX-LEV was added. The reaction was carried out in the dark overnight after addition of acetic acid. The product was purified by gel filtration (Sephadex LH-20, methanol). Cy5.5 labeled conjugates were synthesized by the reaction of Cy5.5-NHS ester with hydrazide groups in star copolymers as previously described.<sup>7</sup>

Linear HPMA copolymer-DTX conjugates (P-DTX) were prepared by radical copolymerization in accordance with previous reports.<sup>12</sup>

### **Characterization of Star Copolymers and Micelles**

The molecular weight (MW) of blank star copolymer was determined by a GPC/HPLC system.<sup>7</sup> The critical micelle concentration (CMC) value of star copolymer-DTX conjugate in distilled water was measured by pyrene fluorescence spectroscopy.<sup>13</sup> The content of FITC in micelles was determined by UV-vis spectrometry using  $\varepsilon_{494}=80\,000\text{ L mol}^{-1}\text{ cm}^{-1}$  (0.1 M borate buffer, pH 9.0). The

conjugation ratio of Cy5.5 to micelles was determined by measuring fluorescence intensity (Ex/Em =676/707nm).

**Table S1.** Characteristics of Synthesized Semitelechelic HPMA Copolymers

| Polymer    | Mw (kDa) | Mw/Mn | Reactive group<br>(mmol g <sup>-1</sup> polymer) | FITC content<br>(wt %) |
|------------|----------|-------|--------------------------------------------------|------------------------|
| P-TT       | 30.1     | 1.65  | TT (0.093)                                       | -                      |
| P-TT-FITC  | 31.3     | 1.71  | TT (0.089)                                       | 4.3                    |
| P-PDS      | 30.8     | 1.78  | PDS (0.079)                                      | -                      |
| P-PDS-FITC | 31.6     | 1.82  | PDS(0.072)                                       | 4.2                    |
| P-SH       | 32.2     | 1.77  | SH(0.061)                                        | -                      |
| P-SH-FITC  | 32.7     | 1.69  | SH(0.060)                                        | 4.2                    |

The molecular weight (MW) of blank star copolymer was approximately 235 kDa, indicating the formation of well-defined star copolymer which constructed with a POSS core and eight semitelechelic copolymer chains (MW = 32 kDa).

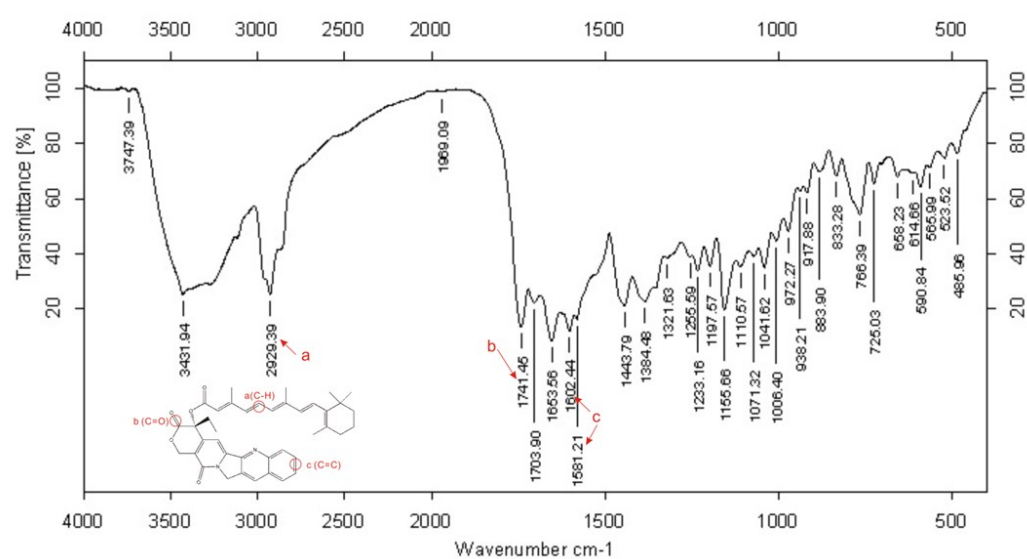

**Figure S1** FT-IR spectrum of CPT-RA.



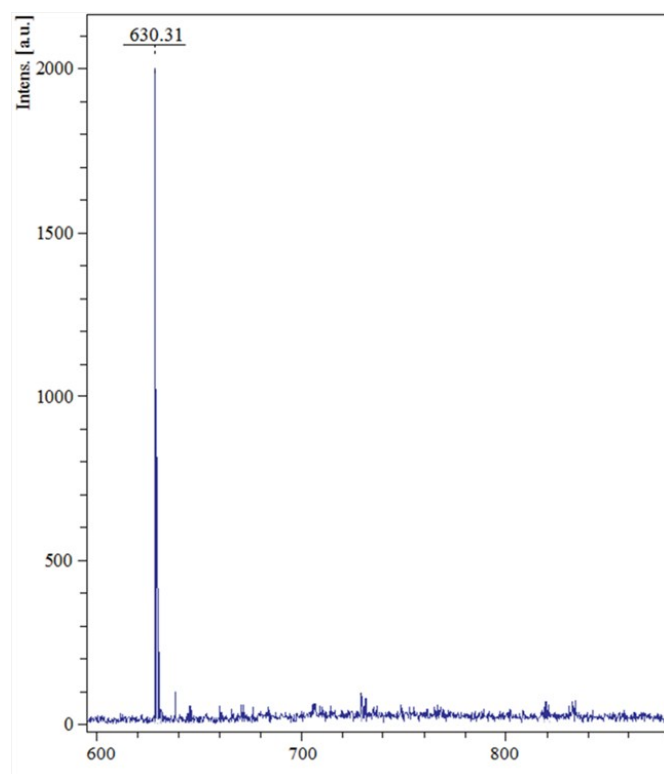

**Figure S2.** MALDI-TOF MS spectrum of CPT-RA.

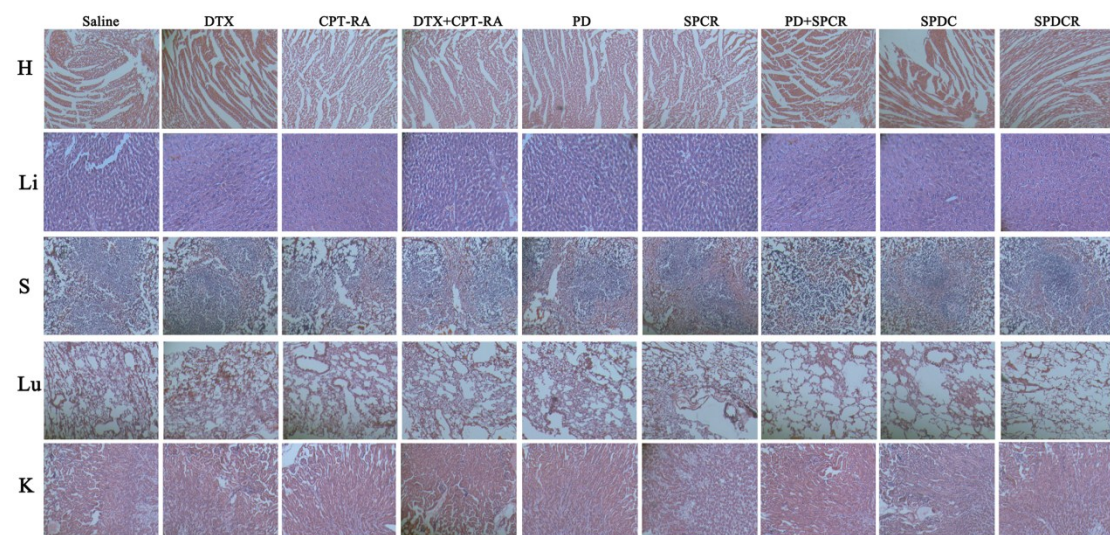

**Figure S3.** Histological evaluation of major organs (heart, liver, spleen, lung, and kidney) from mice bearing stroma-rich prostate xenograft tumor using hematoxylin and eosin (H&E) staining after treatment with either saline, DTX, CPT-RA, DTX+CPT-RA, PD, SPCR, PD+SPCR, SPDC or SPDCR.

## REFERENCES

- (1) Ulbrich, K.; Subr, V.; Strohalm, J.; Plocova, D.; Jelinkova, M.; Rihova, B. Polymeric drugs based on conjugates of synthetic and natural macromolecules. I. Synthesis and physico-chemical characterisation. *J. Controlled Release* **2000**, *64*, 63-79.
- (2) Ulbrich, K.; Etrych, T.; Chytil, P.; Jelinkova, M.; Rihova, B. Antibody-targeted polymer-doxorubicin conjugates with pH-controlled activation. *J. Drug Targeting* **2004**, *12*, 477-489.
- (3) Subr, V.; Konak, C.; Laga, R.; Ulbrich, K. Coating of DNA/poly(L-lysine) complexes by covalent attachment of poly[N-(2-hydroxypropyl)methacrylamide]. *Biomacromolecules* **2006**, *7*, 122-130.
- (4) Omelyanenko, V.; Kopeckova, P.; Gentry, C.; Kopecek, J. Targetable HPMA copolymer-adriamycin conjugates. Recognition, internalization, and subcellular fate. *J. Controlled Release* **1998**, *53*, 25-37.
- (5) Zugates, G. T.; Anderson, D. G.; Little, S. R.; Lawhorn, I. E.; Langer, R. Synthesis of poly(beta-amino ester)s with thiol-reactive side chains for DNA delivery. *J Am Chem Soc* **2006**, *128*, 12726-12734.
- (6) Yang, Q.; Lian, L.; Wei, S.; Zhou, Z.; Yuan, H. Dual Stimuli-Responsive Hybrid Polymeric Nanoparticles Self-Assembled from POSS-Based Star-Like Copolymer-Drug Conjugates for Efficient Intracellular Delivery of Hydrophobic Drugs. *ACS Appl. Mater. Interfaces* **2016**.
- (7) Yang, Q.; Li, L.; Zhu, X.; Sun, W.; Zhou, Z.; Huang, Y. The impact of the HPMA polymer structure on the targeting performance of the conjugated hydrophobic ligand. *RSC Adv.* **2015**, *5*, 14858-14870.
- (8) Etrych, T.; Strohalm, J.; Chytil, P.; Černoch, P.; Starovoytova, L.; Pechar, M.; Ulbrich, K. Biodegradable star HPMA polymer conjugates of doxorubicin for passive tumor targeting. *Eur. J. Pharm. Sci.* **2011**, *42*, 527-539.
- (9) Ulbrich, K.; Etrych, T.; Chytil, P.; Jelinková, M.; Říhová, B. HPMA copolymers with pH-controlled release of doxorubicin: in vitro cytotoxicity and in vivo antitumor activity. *J. Controlled Release* **2003**, *87*, 33-47.
- (10) Ellman, G. L. Tissue sulfhydryl groups. *Arch. Biochem. Biophys.* **1959**, *82*, 70-77.
- (11) Etrych, T.; Strohalm, J.; Šírová, M.; Tomalová, B.; Rossmann, P.; Říhová, B.; Ulbrich, K.; Kovář, M. High-molecular weight star conjugates containing docetaxel with high anti-tumor activity and low systemic toxicity in vivo. *Poly. Chem.* **2015**, *6*, 160-170.
- (12) Etrych, T.; Sirova, M.; Starovoytova, L.; Rihova, B.; Ulbrich, K. HPMA copolymer conjugates of paclitaxel and docetaxel with pH-controlled drug release. *Mol. Pharmaceutics* **2010**, *7*, 1015-1026.
- (13) Zhou, Z.; Li, L.; Yang, Y.; Xu, X.; Huang, Y. Tumor targeting by pH-sensitive, biodegradable, cross-linked N-(2-hydroxypropyl) methacrylamide copolymer micelles. *Biomaterials* **2014**, *35*, 6622-6635.
